# Supplementary material
Source: publisher site journal article supplement (https://www.dovepress.com/get_supplementary_file.php?f=410137.docx)
Supplement: Supplementary file 1 [file get_supplementary_file.php]

***Evaluation of Renal Function Profile in Human Visceral Leishmaniasis (Kala-Azar) Patients: A Case of Western Tigray, Ethiopia***

# Kibrom Gerezgiher, Solomon Tebeje Gizaw *, Natesan Gnanasekaran,

# Department of Medical Biochemistry, School of Medicine, College of Health Sciences, Addis Ababa University, Addis Ababa, Ethiopia

* Corresponding author

Name: **Solomon Tebeje Gizaw(Ph.D.)**

E-mail: solomon.tebeje@aau.edu.et

Mobile number: +251911731148

*Supporting Information*

### Annexe -I -Participants’ information sheet

A. English version

**Title of the project:** Evaluation of renal function profile in human visceral leishmaniasis (kala-azar) patients.

**Principal investigator**: Kibrom Gerezgiher Asfaw (BSc)

#### Introduction

Dear study participants you are invited to participate in the study on the renal profile of kala-azar patients in Kahsay Abera and Mearg Hospital, Tigray Region, Northern Ethiopia. This study is approved by the Department of Medical Biochemistry Research and Ethics Review Committee (DRERC), School of Medicine, College of Health Sciences, Addis Ababa University. You are voluntarily participating in this study and you have a full right to withdraw from participation if you have happened to feel something uncomfortable.

**Purpose of the study.** The main objective of the study is to evaluate renal profiles of kala-azar patients attending Kahsay Abera and Mearg Hospitals, Tigray Region, Northern Ethiopia.

**Duration**: The duration of this study depends on the availability of study subjects and it may take 3-5 months.

**The associated risk with the study**: During sample collection from your vein, there is minor pain or discomfort. The sample is collected by the experienced Nurse and Medical laboratory technologist and the risk is very minimal.

**The procedure of the study:** If you are agreed to participate in this study, you will give about 5mL venous blood for clinical chemistry analysis.

**Expected Benefit**: Dear participants this study assess the renal function profile changes, and provides baseline information for health care providers and policymakers that are believed to contribute for appropriate preventive interventions on kidney damages associated with VL through early diagnosis and preventing complications resulted from such outcome. No payment is requested for the renal function tests.

#### Confidentiality:

The confidentiality of your information and laboratory results are respected strictly. A unique identification number is given to you and your name will be coded and the result of laboratory tests could only be accessed by the researcher.

#### Agreement

Dear participant, you have read all the information described above and you are kindly requested to put your signature to indicate your agreement to participate in the study.

Participant name

Date signature

If you have any question please contact the following address: Principal Investigator: Kbrom Gerezgiher Asfaw (BSc)

Mobile Phone: +251-967562388 Email: [kibromgere14@gmail.com](mailto:kibromgere14@gmail.com)

### Annex II consent form (adult study participants) –

A. English version

**Principal investigator**: Kibrom Gerezgiher Asfaw (BSC)

**Research title**: Evaluation of renal function profile in human visceral leishmaniasis (kala-azar) patients.

I have read or have had this document read to me in a language that I understand, and I understand the purposes, procedures and risks of this research project as described within it. I understand that at any time I may withdraw from this study without giving a reason*.* I know that no special payment for being participating in the study. I freely agree to participate in this study, as described. I understand that I was given a signed copy of this document to keep.

Name of participant. Age Address Signature_ Date

Interviewer’s name Signature

Principal investigator Name Signature

### Annex III: Parental consent form

1. English version

I, parent, after being fully informed about the purpose of this study on the evaluation of renal function profile among patients with human visceral leishmaniasis (Kala-azar).

I, the undersigned, have been told about this research. I have been informed there is no harm related to giving specimen. I have been informed that other people will not know my child results as it coded with a number rather than writing name. I understand that there may be no benefit to me personally apart from clinical service I get from these results. I have been encouraged to ask questions and have had my questions answered. I have been told that participation in this study is voluntary and I may refuse to be in the study. I know my participation will also be approved by my child. By signing below I agree to let my child participate in this research study.

/ /

| Name of parent | signature | Day/month/year  / / |
| --- | --- | --- |
| Witness (Illiterate) |  | Day/month/year  / / |
| Name of the interviewer | Signature | Day/month/year |

/ /

Name of the researcher Signature Day/month/year

### Annexe IV: Consent form for children aged 12-17 years

1. English version

I fully informed about the purpose of this study on Evaluation of renal function profile among patients with human visceral leishmaniasis (kala-azar).

I have been informed there is no harm related to giving specimen. I have been informed that other people will not know my test results as it coded with a number rather than writing name. I understand that there may be no benefit to me personally apart from clinical service I get from these results. I have been allowed to ask questions and my questions have been answered to my satisfaction. I voluntarily assent that I would participate in this study provided my parents/guardians to give their consent to give my blood for the study.

Name of participant signature Day/month/year

/ /

Witness (Illiterate)

Parents phone number

Name of interviewer Signature Day/month/year

/ /

Name of the researcher Signature Day/month/year

/ /

### Annexe V: Structured Questionnaire for kala-azar patients and control group

1. English version Identification no: -----------------

Name of facility

Region Zone Woreda _

**Note:** Please Encircle or Write the appropriate answer to the provided space.

| No. | Variable | Response |
| --- | --- | --- |
| 1 | Sex | 1. Male 2. Female |
| 2 | Age |  |
| 3 | Weight |  |
| 4 | Height |  |
| 5 | Marital Status | 1. Single 2. Married 3. Divorced 4. Widowed |
| 6 | Educational status | 1. Illiterate 2. Primary 3.Secondary 4.Diploma and above |
| 7 | Residence | 1. Rural 2. Urban |
| 8 | Occupation status | 1. Student 2. Housewife 3. Government employer  4. Private employers 5. Farmer 6. Merchant 7. Daily labour 8. Other |
| 9 | Duration of illness | 1. 0-4 weeks 2. > 4 weeks |
| 10 | Do you have a history of hypertension? | 1. Yes 2. No |

| 11 | Do you have a history of HIV/AIDS? | 1. Yes 2. No |
| --- | --- | --- |
| 12 | Do you have history tuberculosis for the past two years? | 1. Yes 2. No |
| 13 | Do you have a history of DM? | 1. Yes 2. No |
| 14 | Do you have a habit of smoking? | 1. Yes 2. No |
| 15 | If yes to Q#14, how often do you smoke? | 1. ≤ 1cigarate perd ay 2. 2-3 cigarate per day 3. >3 cigarate per day |
| 16 | Do you drink alcohol? | 1. Yes 2. No |
| 17 | If yes to Q#16, how often do you take? | 1 one beer bottle per day 2. Two or three beer bottle per week 3. More than four beer bottle per week 4. some times (holiday ) |
| 18 | Do you take any medication within the last three months? | 1. Yes 2. No |
| 19 | If yes to Q#18, what type of drug did you take? | 1. Anti-protozoa 2. Anti-bacterial 3. Anti-TB  4. Others |
| 20 | Do you have a history of chronic liver disease? | 1. Yes 2. No |
| 21 | Do you have a history of chronic kidney disease? | 1. Yes 2. No |

| 22 | Do you have a history of cancer? | 1. Yes 2. No |
| --- | --- | --- |
| 23 | Do you have a history of chronic heart disease? | 1. Yes 2. No |
| 24 | Creatinine level? |  |
| 25 | Urea? |  |
| 26 | Uric acid? |  |
| 27 | eGFR? |  |

We highly appreciate your kind cooperation on behalf of the research group, the hospital, Addis

###

### Annex VI. Standard operating procedure

The biochemistry reagents and protocols were Jouri Lab products(1).

#### SOP for Blood Collection Equipment

- - - 21 gauge needle for each participant
    - Blood collection tubes (serum separator tube)
    - Tourniquet
    - Box of nitrile/vinyl glove
    - 70% alcohol
    - Cotton

#### Laboratory Blood sample collection procedure and processing

1. Assemble blood collection materials.
2. Identify and prepare the patient
3. Label tubes with the client’s name/identification number.
4. Wear the rubber gloves and make the patient a comfortable position
5. Tie the tourniquet around the arm of the patient just above the bend in the elbow. The tourniquet should be positioned 7.5cm to 10cm above the puncture site.
6. using the tip of the index finger examine the phlebotomy site, feel the vein, and decide exactly where to place the puncture
7. Disinfect the phlebotomy site by swabbing the skin in small outward circles with an alcohol swab.
8. Insert the needle directly into the vein and withdraw peripheral blood of approximately 3ml in serum separator tube
9. Withdraw the needle from the vein and cover the puncture site cotton swab and hold pressure at the puncture site for 3 minutes.
10. Properly discard the used materials in a safe container.
11. Leave for 30 to 45 min. to clot the blood
12. Centrifuge at 4000 rpm for 5 minutes and Serum will separate

###

### Annex VII: Principles of clinical chemistry tests

#### Renal Function Assay Creatinine

Principle

This procedure is based upon a modification of the original picrate reaction(2). Creatinine under alkaline conditions reacts with picrate ions forming a reddish complex. The formation rate of the complex measured through the increase of absorbance in a prefixed interval of time is proportional to the concentration of creatinine in the sample.

Creatinine + picric acid PH>12 creatinine picrate complex

370c

Procedure

1. Preincubate working reagent, samples and standard to reaction temperature (37ºC).
2. Set the photometer to 0 absorbance with distilled water.
3. Pipette into a cuvette**.** Working reagent: 1.0 ml Sample or standard: 100 μL
4. Mix gently. Insert the cuvette into the temperature-controlled instrument and start a stopwatch.
5. Record absorbance at 510 nm after 30 seconds (A1) and after 90 seconds (A2) of the sample or standard addition.

Calculations

(A2 - A1) Sample x Standard deviation = mg/dL creatinine

(A2 - A1) Standard

Samples with concentrations higher than 20 mg/dL should be diluted 1:4 with saline and assayed again. Multiply the results by 4. If results are to be expressed as SI units apply: mg/dL x 88.4 = μmol/L

Result interpretations

Creatinine is synthesized in the body at a fairly constant rate from creatine, which is produced during muscle contractions from creatine phosphate. Creatinine in the blood is then removed by filtration through the glomeruli of the kidney for excretion in the urine. Since the excretion of creatinine in healthy individuals is independent of diet and thus relatively constant, the creatinine

Clearance (CC) test is one of the most sensitive tests to diagnose renal function especially the glomerular filtration rate (GFR) the concentration of creatinine in serum being dependent almost entirely upon its rate of excretion by the kidney. Elevated levels of creatinine in serum are usually associated with renal diseases, especially those related to GFR such as glomerular nephritis(1).

#### Urea

Principle

The test is performed as a kinetic assay in which the initial rate of the reaction is linear for a limited time. Urea in the sample is hydrolyzed by urease to ammonia and carbon dioxide. The second reaction, catalyzed by glutamate dehydrogenase (GLD) converts ammonia and α- ketoglutarate to glutamate and water with the concurrent oxidation of reduced nicotinamide adenine dinucleotide (NADH) to nicotinamide adenine dinucleotide (NAD). Two moles of NADH is oxidized for each mole of urea present. The initial rate of decrease in absorbance at 340 nm is proportional to the urea concentration in the sample

Result interpretations

Urea is the nitrogen-containing end product of protein catabolism. States associated with elevated levels of urea in the blood are referred to as hyperuricemia or azotemia. Parallel determination of urea and creatinine is performed to differentiate between pre-renal and post-renal azotemia. Pre-renal azotemia, caused by e.g. dehydration, increased protein catabolism, cortisol treatment or decreased renal perfusion, leads to increased urea levels, while creatinine values remain within the reference range. In post-renal azotemias, caused by the obstruction of the urinary tract, both urea and creatinine levels rise, but creatinine in a smaller extent ([JOURILABS/biochemistry reagents,](#_bookmark121) [2019](#_bookmark121)).

#### Uric acid

Principle

Uric acid is oxidized to allantoin by uricase (Manufacturer) with the production of hydrogen peroxide (H2O2). The H2O2 reacts with 4-aminoantipyrine (4-AAP) and 2, 4, 6-tribromo-3-hydroxybenzoic acid (TBHB) in the presence of peroxidase to yield a quinoneimine dye. The resulting change in absorbance at 548 nm is proportional to the uric acid concentration in the sample.

Result interpretation

Uric acid is the final product of endogenic and exogenic (food origin) purine catabolism (adenosine and guanidine). This transformation takes place mainly in the liver. Approximatively 75% of uric acid is eliminated by kidneys; the rest is released in the gastro-intestinal tract where it will be degraded by the intestinal flora. Seric hypouricaemia is more unusual. This decrease can be observed in different cases as defect of renal elimination (Fanconi syndrome) ([JOURILABS/biochemistry reagents, 2019](#_bookmark121))

#### Glomerular Filtration Rate (GFR)

It is the rate (volume per minute) at which the filtration of blood is performed by the glomerulus and transferred to Bowman's space. It is determined practically by measuring creatinine clearance. Creatinine clearance can be calculated without a 24-hour urine collection using Cockcroft equation which requires (serum creatinine concentration, sex, age, and weight)

Cockcroft equation:


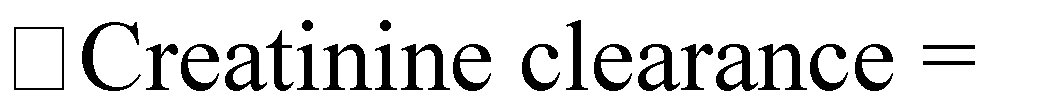
(140 – age) x weight x constant


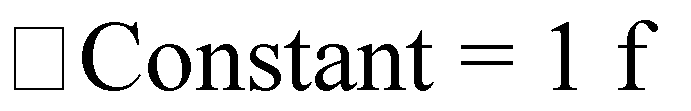

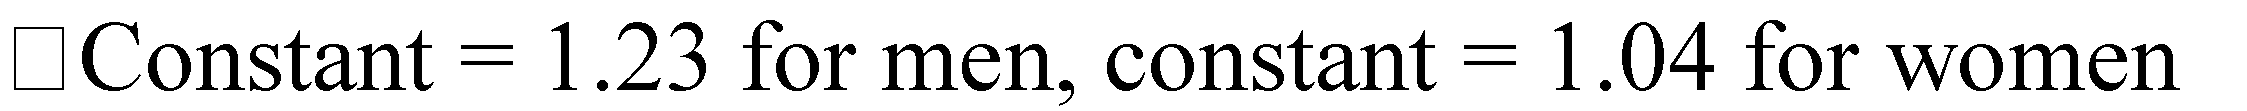
Serum creatinine


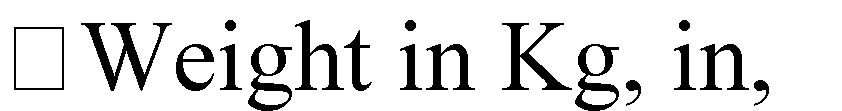

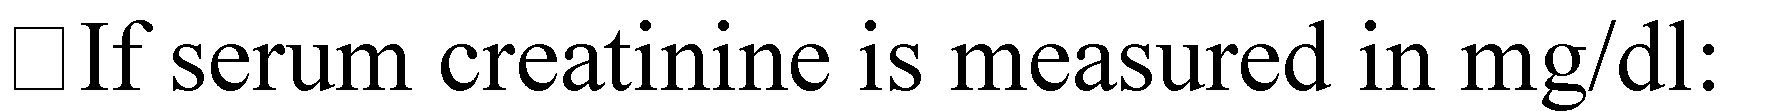

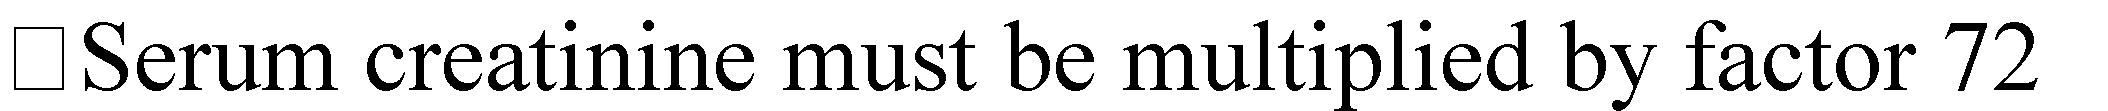


or men, constant = 0.85 for women


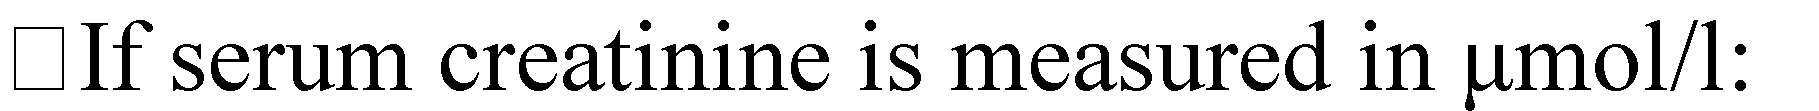


([Cockcroft and Gault, 1976](#_bookmark94))

#### Adult Reference Ranges for RFT

Instrument used: Mindray 200E (Germany)

| S.no | Parameter | Reference | | unit |
| --- | --- | --- | --- | --- |
| Men | Women |
| 1 | Urea | 18-45 | 18-45 | mg/dL |
| 2 | Creatinine | 0.6- 1.3 | 0.5 – 0.9 | mg/dL |
| 3 | Uric acid | 3.5 - 7.2 | 2.6 - 6 | mg/dL |

- 1. Anthropometrical measurements

The weight of VL patients was measured using a standard balance, and the height was measured using a height measuring device attached to the balance. BMI was then calculated from the body weight (kg) and height (m). Using the World Health Organization (WHO) classification, four categories of BMI can be identified as follows: underweight, <18.5 kg/m2; normal, >18.5–24.9 kg/m2; overweight, >25.0– 29.9 kg/m2; and obesity, >30 kg/m2. The nutritional status of the patients was also determined using body mass index (BMI). Using the World Health Organization (WHO) classification, the nutritional status was defined as severe, moderate,mild and normal when the individual had BMI of <16, ≥16- < 17, ≥17- < 18.5 and ≥18.5, respectively ([WHO, 2004](#_bookmark165)).

# Declaration

I, the undersigned, declare that this MSc thesis is my original work and all sources of materials used for the thesis have been duly acknowledged.

Name of the principal investigator: Kibrom Gerezgiher Asfaw (BSc, MSc candidate) Signature:

Date of submission:

| **Advisors**; | Signature | Date |
| --- | --- | --- |
| Dr**.** Solomon Tebeje Gizaw (PhD) |  |  |
| Dr. Natesan Gnanasekaran (PhD) |  |  |
| Place: Addis Ababa, Ethiopia |  |  |

1. JouriLabs. Biochemistry Reagents Addis Ababa: Jouri Labs; 2019 [cited 2019. Available from: <http://jourilabs.com/Products.php?id=1>.

2. Delanghe JR, Speeckaert MM. Creatinine determination according to Jaffe—what does it stand for? Nephrology Dialysis Transplantation Plus. 2011;4(2):83-6.
